# Supplementary material for: Organic/inorganic heterostructures templated by interfacial instability-driven BCP colloids in deformable emulsion droplets
Source: Royal Society of Chemistry journal article supplement (doi:10.1039/d4sm00921e), 2024-01-01
Supplement: d4sm00921e1.pdf [file d4sm00921e1.pdf]

## Supporting Information

Organic/inorganic heterostructures templated by interfacial  
instability-driven BCP colloids in deformable emulsion droplets

Yuqing Song, Nan Yan\*, Lingli Wan, Jingjing Li, Ye Gao\*

College of Chemistry, Research Institute for Scientific and Technological Innovation,

Changchun Normal University, Changchun 130032, China

E-mail: [yannan@ccsfu.edu.cn](mailto:yannan@ccsfu.edu.cn); [gaoye@ccsfu.edu.cn](mailto:gaoye@ccsfu.edu.cn)

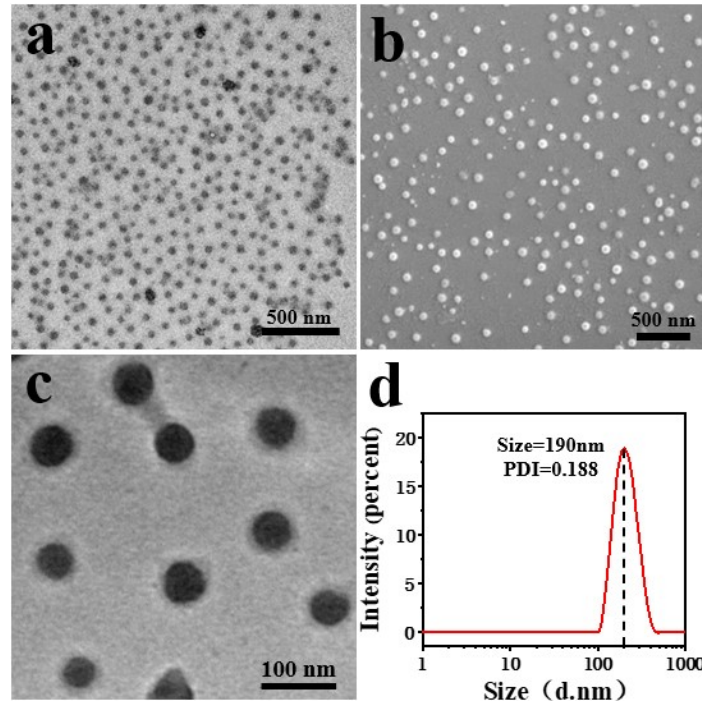

**Fig. S1.** (a) TEM and (b) SEM images of the highly uniform PS<sub>38k</sub>-*b*-P4VP<sub>82k</sub> spherical clusters at relatively low magnification. (c) Magnified TEM image of PS<sub>38k</sub>-*b*-P4VP<sub>82k</sub> spherical clusters, in which the P4VP domains are selectively stained by I<sub>2</sub> vapor. (d) The size distribution of the PS<sub>38k</sub>-*b*-P4VP<sub>82k</sub> spherical colloids by DLS measurement.

The time autocorrelation function can be expressed as the equation of

$$g(2)(\tau) = \frac{\langle I(t) \cdot I(t+\tau) \rangle}{\langle I(t) \rangle^2},$$

in which  $I(t)$  represents the intensity of scattered light at a

given time  $t$ , while  $\langle I(t) I(t+\tau) \rangle$  is the average of the product of light intensities at times  $t$  and  $t+\tau$ .  $\langle I(t) \rangle^2$  denotes the square of the mean intensity of the light. The attenuation characterization of this autocorrelation function, which varies with the delay time ( $\tau$ ), can be used to calculate the diffusion coefficient of the particle, thus generating the size distribution of the particles.

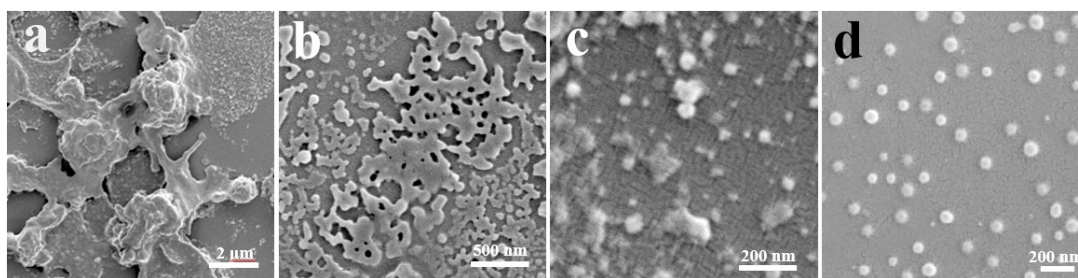

**Fig. S2.** SEM images of  $PS_{38k}\text{-}b\text{-}P4VP_{82k}$  assemblies emulsified with SDS aqueous solution of different concentrations. (a) 0.1 mg/mL; (b) 0.2 mg/mL; (c) 0.5 mg/mL; (d) 3 mg/mL.

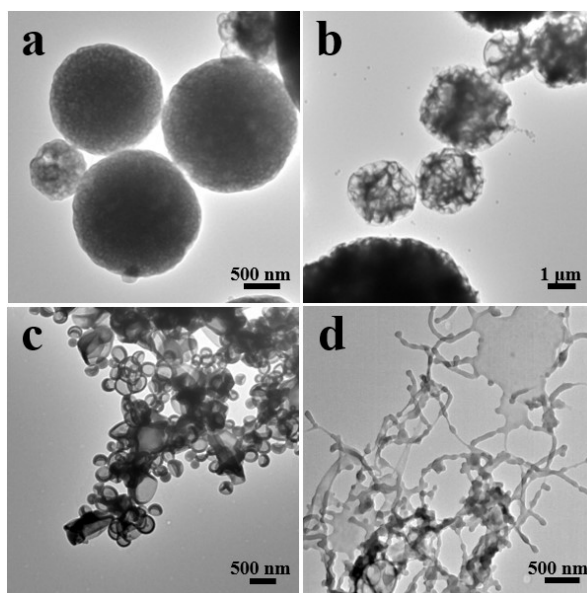

**Fig. S3.** A series of BCP aggregates assembled from (a)  $PS_{35k}\text{-}b\text{-}P4VP_{2.7k}$ ; (b)  $PS_{165k}\text{-}b\text{-}P4VP_{35k}$ ; (c)  $PS_{75k}\text{-}b\text{-}P4VP_{25k}$ ; and (d)  $PS_{102k}\text{-}b\text{-}P2VP_{97k}$ .

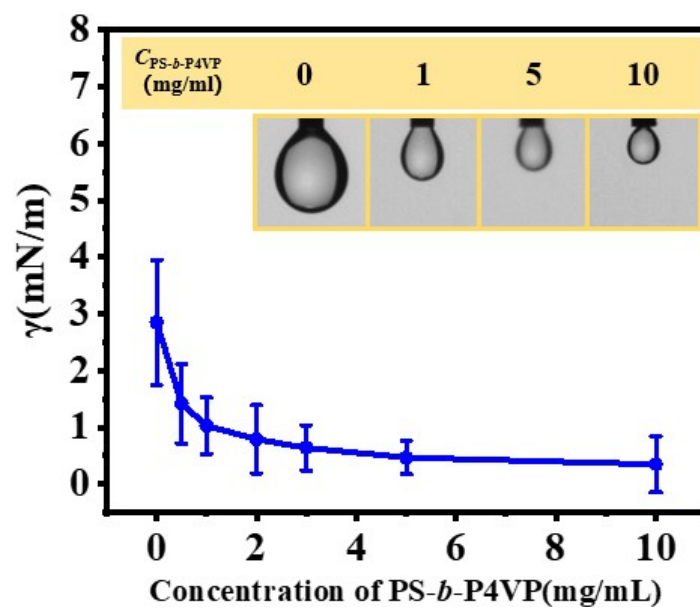

**Fig. S4.** The plot showing the interfacial tension values of the  $PS_{38k}-b-P4VP_{82k}$  chloroform solution of different BCP concentrations in 3.0 mg/mL of SDS aqueous solution.

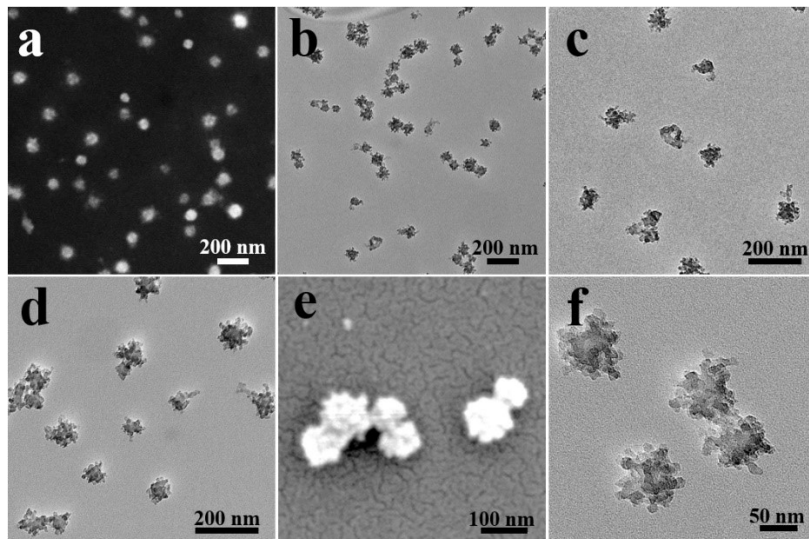

**Fig. S5.** (a) STEM and (b-d) TEM images of the hybrid heterostructures. Magnified (e) SEM and (f) TEM images of  $PS_{38k}-P4VP_{82k}/SiO_2$  heterostructures.

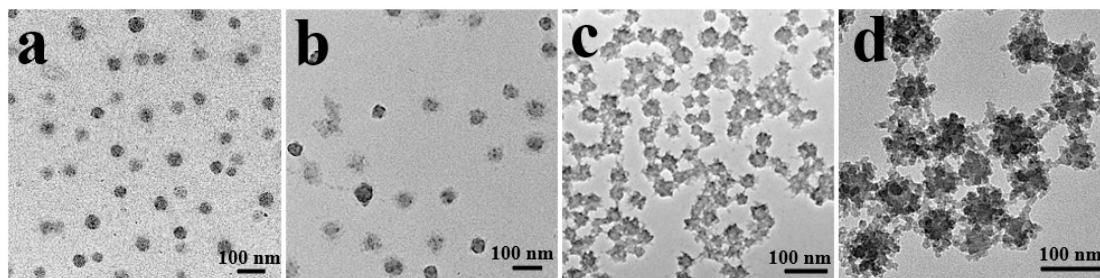

**Fig. S6.** A series of TEM images of PS<sub>38k</sub>-*b*-P4VP<sub>82k</sub>/SiO<sub>2</sub> heterostructures with varied SiO<sub>2</sub> layer thickness generated by addition different amount of TEOS precursor. (a) 1  $\mu$ L; (b) 3  $\mu$ L; (c) 4  $\mu$ L; (d) 5  $\mu$ L.
